# Supplementary material
Source: PubMed Central journal article supplement (PMC6866595)
Supplement: HBM-39-1814-s001.pdf [file HBM-39-1814-s001.pdf]

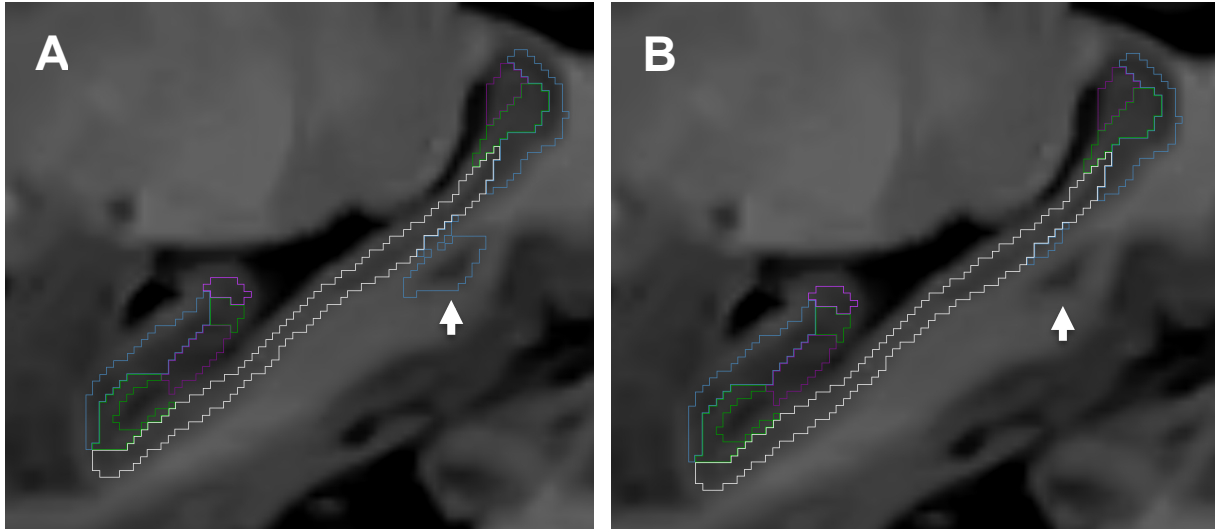

**Supplementary figure 1:** Example of manual correction of the automated segmentation (A: automated segmentation; B: edited segmentation). The error was due to a MS parahippocampal “black hole“ that was mistaken for a part of the CA1-SP (in blue).
